# Supplementary material for: Inhibitory Peptide of Soluble Guanylyl Cyclase/Trx1 Interface Blunts the Dual Redox Signaling Functions of the Complex
Source: MDPI journal article supplement (doi:10.3390/antiox12040906), 2023-04-10

## **SUPPLEMENTARY MATERIALS**

### **Inhibitory peptide of soluble guanylyl cyclase/Trx1 interface blunts the dual redox signaling functions of the complex**

Chuanlong Cui, Ping Shu, Tanaz Sadeghian, Waqas Younis, Hong Li, Annie Beuve

Figure S1: Sequence of peptides designed to disrupt the GC1/Trx1 complex in a purified system.

Figure S2: Peptide designed to disrupt the GC1/Trx1 complex in cells. a) Sequences of the peptide; b) imaging of peptides penetration in COS-7 cells; c) Western blots of lysates from COS-7 cells transfected with GC1 and treated with DMSO or peptides; d) Basal activity in COS-7 cells overexpressing GC1 is unchanged by the peptides treatment.

Figure S3: NO-stimulated specific activity of GC1  $\pm$ Trx1 mixed with each peptide, expressed in nmol.min<sup>-1</sup>.mg<sup>-1</sup>.

Figure S4: NO-stimulated activity of GC1 is not affected by incubation with the peptides alone.

Figure S5: Western blot under reducing conditions of the inputs used in Figure 2A showing that the starting material was similar in each proteins mix.

Figure S6: Western blot under reducing conditions of the inputs used in Figure 2B showing that the starting material was similar in each proteins combination.

Figure S7: Uncropped Western blots from Figure 3A and including ascorbate controls.

Figure S8: Input of Jurkat cells used as starting material for biotin/avidin switch assay of Figure 4.

Figure S9: Uncropped Western blot and Ponceau red stained blot from Figure 4.

**Figure S1: Sequence of peptides designed to disrupt the GC1/Trx1 complex in a purified system.** Peptides 1, 2 and 3 were designed in the proximity of C610 (in red). C-terminal region of the GC1  $\alpha$  subunit is shown (human sequence; 100 % identity with rat, mouse and bovine sequences in this region). Peptide 1: (601) VTLANKFESCS (611); Peptide 2: (605) NKFESCSVPRK (615); Peptide 3: (614) RKINVSPPTYR (624); Peptide 4 (scramble): KSRVNPSKCEF. Synthesized by Epoch life.

```

481  TMLFSDIVGFTAICSQCSPLQVITMLNALYTRFDQQCGELDVYKVETIGD  530
531  AYCVAGGLHKESDTHAVQIALMALKMMELSDEVMSPHGEPIKMRIGLHSG  580
      1.VTLANKFESCS 3.RKINVSPPTYR
581  SVFAGVVGGKMPRYCLFGNNVTLANKFESCSVPRKINVSPPTYRLLKDCP  630
      2.NKFESCSVPRK
631  GFVFTPRSREELPPNFPSEIPGICHFLDAYQQGTNSKPCFQKKDVEDGNA  680
681  NFLGKASGID

```

**Figure S2: Peptide designed to disrupt the GC1/Trx1 complex in cells.**

Figure S2a. Sequences of the peptide. Previous peptide 3 (yellow highlight) was selected for addition of the fluorophore FITC at the N-terminal followed by a cell penetrating sequence highlighted in blue. The scramble peptide (grey highlight) was similarly modified. Synthesized by Abclonal science.

Inhibitory peptide: FITC-RKKRWFRRRRPKWKKRKINVSPPTYR

Scramble peptide: FITC-RKKRWFRRRRPKWKKKSRVNPSKCEF

Figure S2b: imaging of peptides penetration in COS-7 cells. Imaging of COS-7 cells overexpressing GC1 treated with DMSO (0.7%) or 10  $\mu$ M inhibitory peptide or scramble peptide. Representative images taken with a Zeiss 200 microscope (20X objective; 800 ms exposure of green fluorescence imaging).

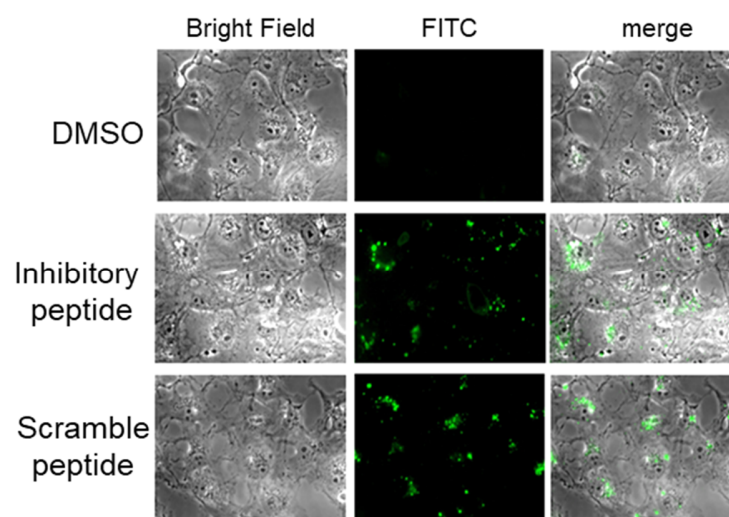

Figure S2c: Western blots of lysates from COS-7 cells transfected with GC1 and treated with DMSO or peptides, showing similar overexpression of GC1  $\alpha$  and  $\beta$  subunits, and endogenous expression of thioredoxin 1. In each lane, 40  $\mu$ g of lysates were subjected to electrophoresis (12 % SDS-PAGE) and probed with anti- $\alpha$  (1:1000, ThermoFisher), anti- $\beta$  (1:1000, Cayman) and anti-Trx1 (1:500, Cell signaling) antibodies.

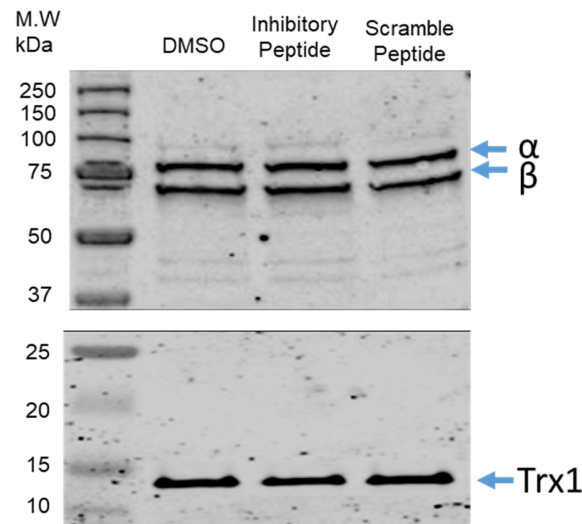

Figure S2d: Basal activity in COS-7 cells overexpressing GC1 is unchanged by the peptides treatment. In contrast to the NO-stimulated GC1 activity, there was no significant difference for the basal specific activity treated with DMSO (control), inhibitory peptide and the scramble peptide (Materials and Methods).  $n=4$  independent experiments in duplicate.

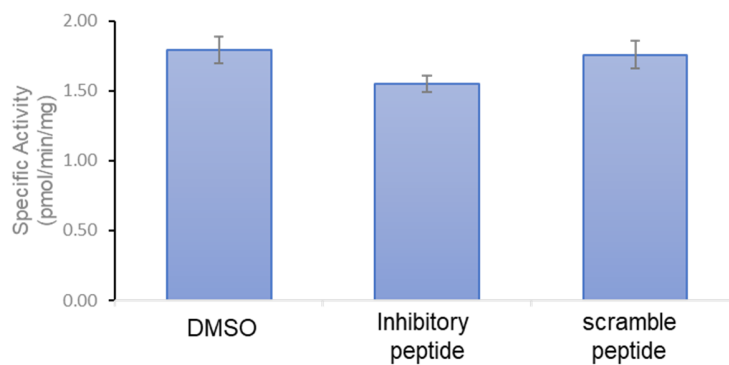

**Figure S3: NO-stimulated specific activity of GC1  $\pm$  Trx1 mixed with each peptide, expressed in nmol cGMP.min<sup>-1</sup>.mg<sup>-1</sup>.** These data were used to calculate the fold changes and significance of difference between GC1 and the different mixtures of Fig.1A. DEA-NO was the NO-donor, used at 1  $\mu$ M final concentration.  $n=4$  independent experiments in duplicate, expressed in nmol cGMP.min<sup>-1</sup>.mg<sup>-1</sup>  $\pm$  S.E.M.

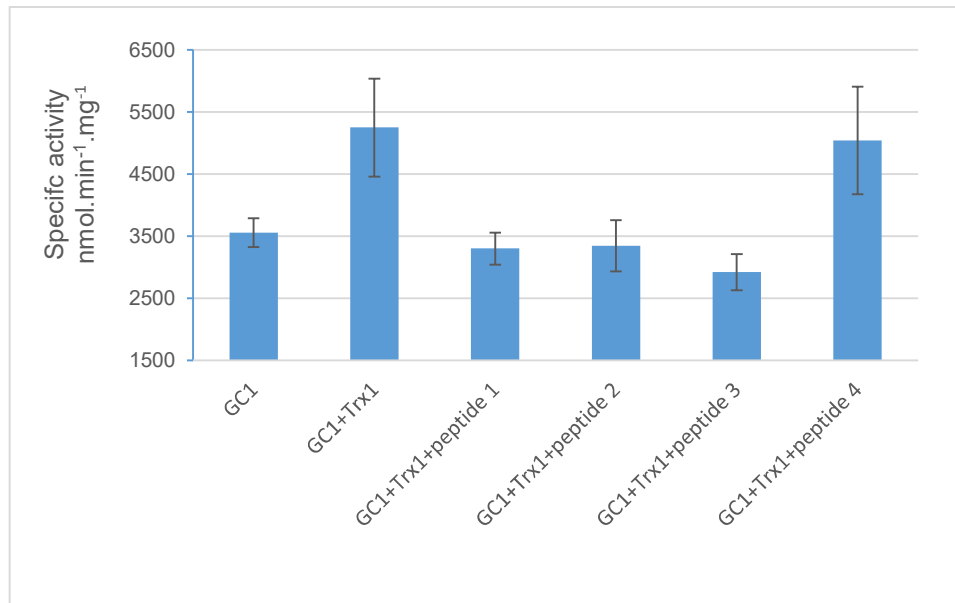

**Figure S4: NO-stimulated activity of GC1 is not affected by incubation with the peptides alone.** DEA-NO was the NO-donor, used at 1  $\mu$ M final concentration.  $n=4$  independent experiments done in duplicate. NO-stimulated activity of GC1 was compared to NO-stimulated GC1 activity in the presence of the various peptides in the same in vitro/purified system as above.

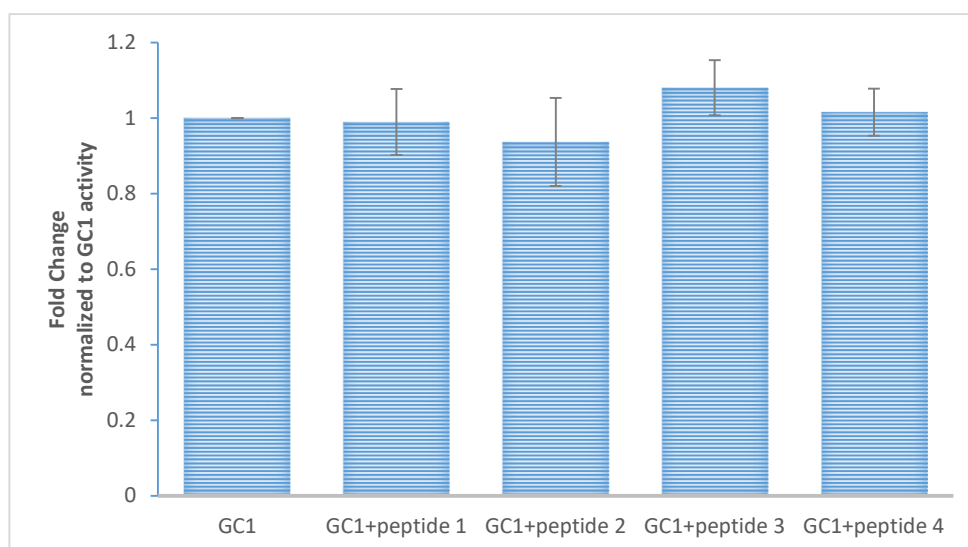

**Figure S5: Western blot under reducing conditions of the inputs used in Figure 2A** showing that the starting material was similar in each combination. Samples were electrophorated on 12% SDS-PAGE reducing gel, then transferred and probe with anti- $\alpha$  (1:1000, ThermoFisher), anti- $\beta$  (1:1000, Cayman) and anti-Trx1 (1:500, Cell signaling) antibodies. The system of detection was an Odyssey imager, using fluorescent secondary antibodies.

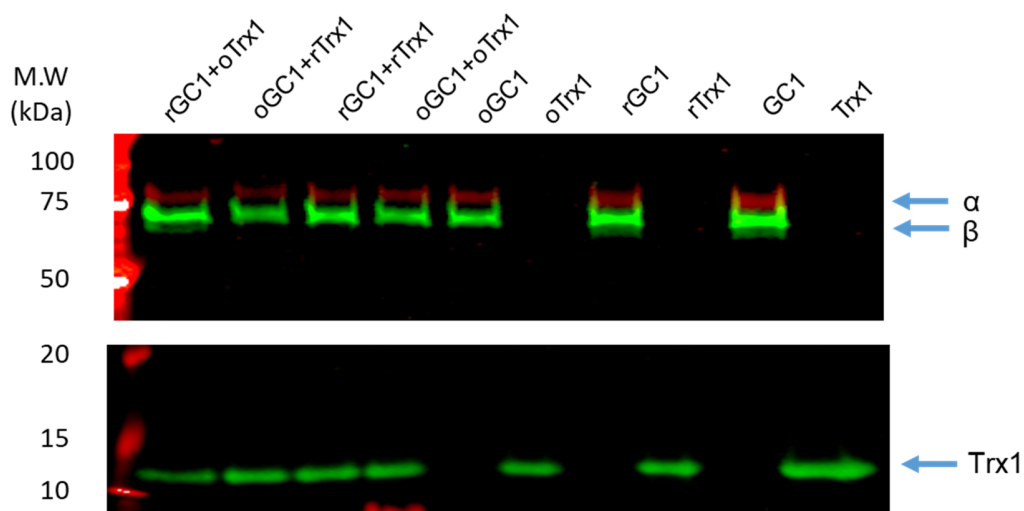

**Figure S6: Western blot under reducing conditions of the inputs used in Figure 2B** showing that the starting material was similar in each combination. Samples were electrophorated on 12% SDS-PAGE reducing gel, then transferred and probe with anti- $\alpha$  (1:1000, ThermoFisher), anti- $\beta$  (1:1000, Cayman) and anti-Trx1 (1:500, Cell signaling) antibodies. The system of detection was an Odyssey imager, using fluorescent secondary antibodies.

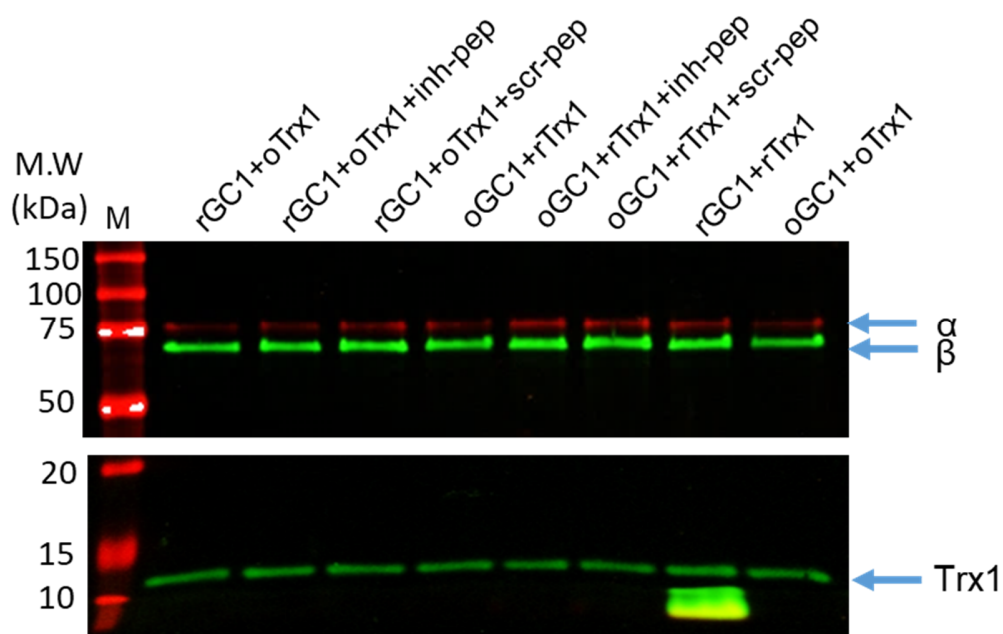

**Figure S7: Uncropped Western blots from Figure 3A.** Controls of the biotin switch assays were samples not treated with Ascorbate (no Asc). Left is imaging with fluorescent secondary antibodies using an Odyssey imager. Only GC1 was detectable; the blot was thus reprobed with HRP secondary antibodies and Trx1 was detected by enhanced chemiluminescence (ECL).

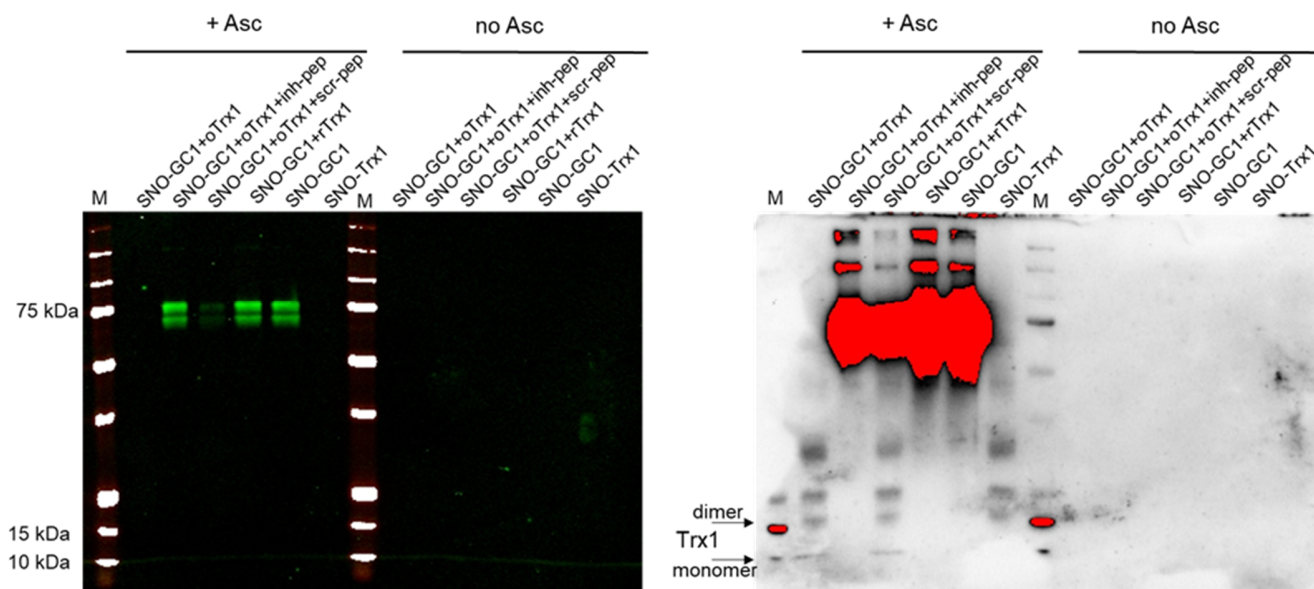

**Figure S8: Input of Jurkat cells used as starting material for biotin/avidin switch assay of Figure 4.** Left panel: Ponceau red staining of the membrane of electrophorated samples on a 12% reducing gel. Right panel, same blot probed with anti- $\alpha$ , anti- $\beta$  (Cayman, 1:1000), anti-casp-3 (Novus Biologicals, 1:500) and anti-Trx1 (Cell signaling, 1:1000) antibodies. Note the decreased intensity of procasp-3 signal suggesting increased processing in Jurkat cells treated with etoposide (ETO at 8  $\mu$ M) and the inhibitory peptide compared to the controls (DMSO, scramble peptide) treated with ETO.

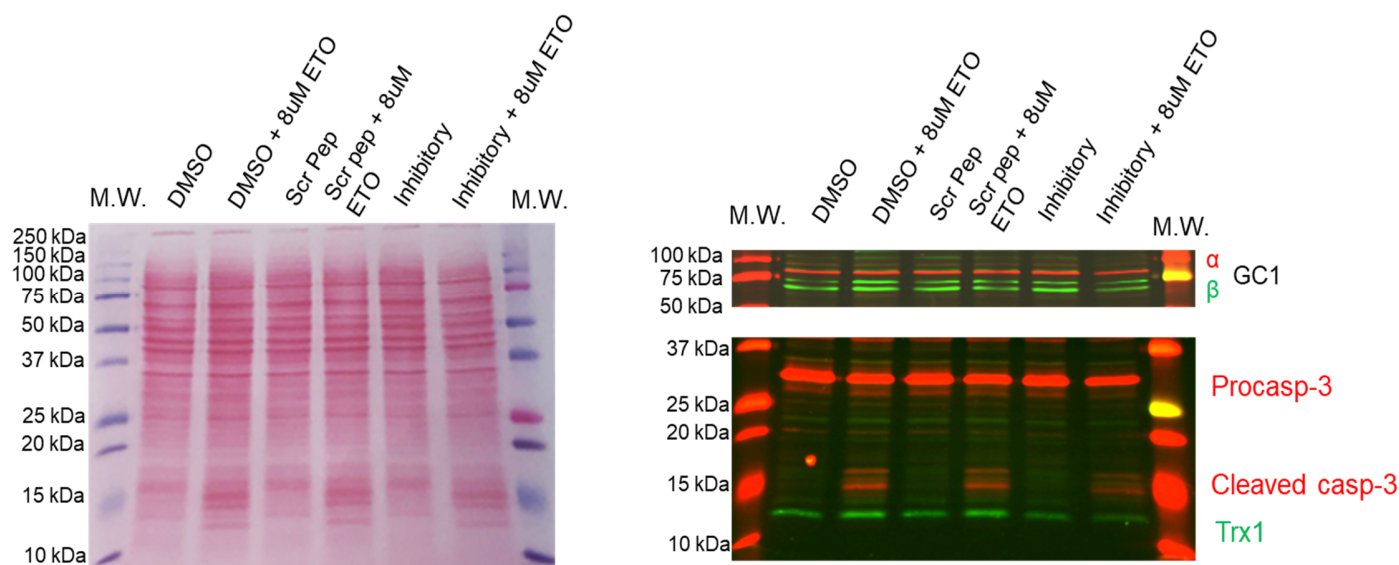

**Figure S9: Uncropped Western blots from Figure 4.** Samples of the biotin switch assays including samples not treated with Ascorbate (- Asc) were electrophorated on non-reducing gel. Left panel, Ponceau red of the corresponding blots showing similar amount of samples. Right panel, blot was probed with anti-biotin antibodies as described in Methods.

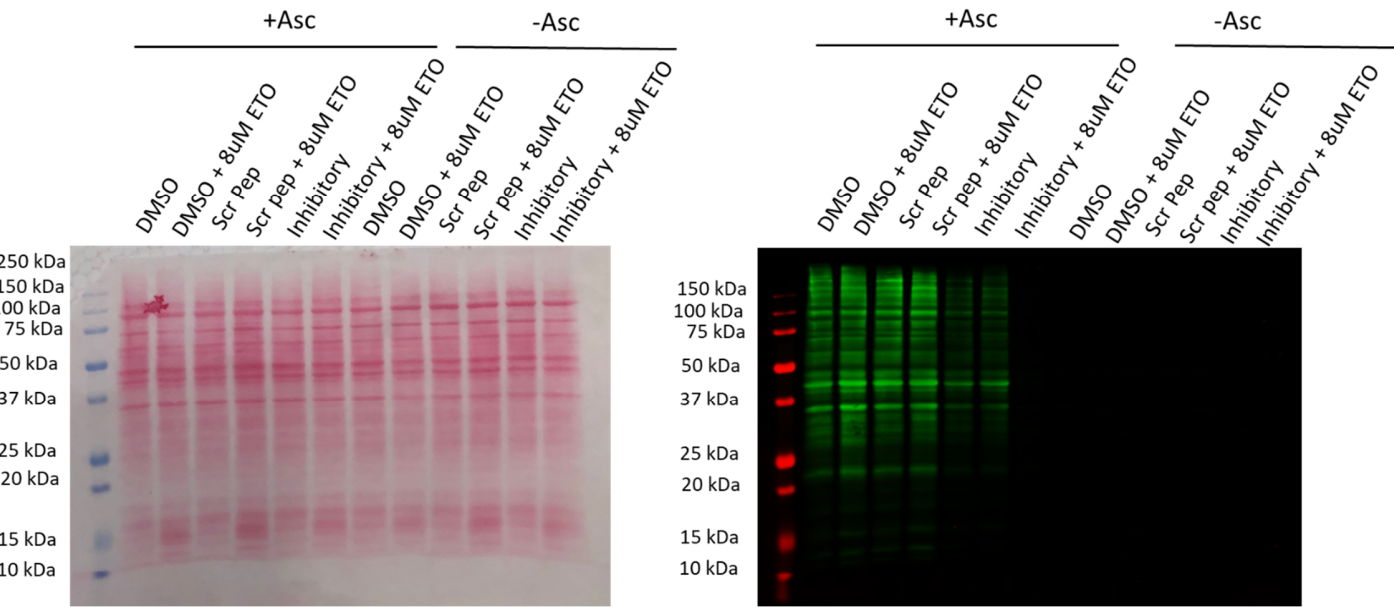

Supplement: s1 [file s1]
